# Supplementary material for: An Investigation of Modifying Effects of Metallothionein Single-Nucleotide Polymorphisms on the Association between Mercury Exposure and Biomarker Levels
Source: PubMed Central journal article supplement (PMC3339459; doi:10.1289/ehp.1104079), 2012-01-09
Supplement: ehp.1104079.s001.pdf [file ehp.1104079.s001.pdf]

## Supplemental Material

# An Investigation of Modifying Effects of Metallothionein Single Nucleotide Polymorphisms on the Association between Mercury Exposure and Biomarker Levels

## Author and Affiliations

Yi Wang<sup>1</sup>, Jaclyn M. Goodrich<sup>1</sup>, Brenda Gillespie<sup>2</sup>, Robert Werner<sup>1,3</sup>, Niladri Basu<sup>1</sup>, Alfred Franzblau<sup>1\*</sup>

<sup>1</sup> Department of Environmental Health Sciences, School of Public Health, University of Michigan, Ann Arbor

<sup>2</sup> Department of Biostatistics, School of Public Health, University of Michigan, Ann Arbor

<sup>3</sup> Department of Physical Medicine and Rehabilitation, University of Michigan, Ann Arbor

University of Michigan School of Public Health, 1415 Washington Heights, Ann Arbor, MI USA 48109

\* Corresponding author:

Alfred Franzblau, M.D.

M6023 SPH II, 1415 Washington Heights, University of Michigan School of Public Health, Ann Arbor, MI 48109-2029, USA

Email: [af Franz@umich.edu](mailto:af Franz@umich.edu)

Office: +1 (734)936-0758 Fax: +1 (734)763-8095

## Table of Contents

|                                                                                                                                                                                                                                                                                                                                                                                                                                                                                                                                                   |   |
|---------------------------------------------------------------------------------------------------------------------------------------------------------------------------------------------------------------------------------------------------------------------------------------------------------------------------------------------------------------------------------------------------------------------------------------------------------------------------------------------------------------------------------------------------|---|
| Supplemental Material Figure 1. a: Scatter Plot of Ln-transformed Urine Hg against Number of Personal Amalgams Stratified by MT1M (rs2270836) Genotype; b: Scatter Plot of Ln-transformed Urine Hg against Number of Amalgam Handled Stratified by MT1M (rs2270836) Genotype; c: Scatter Plot of Ln-transformed Hair Hg against Estimated Daily Hg Intake from Fish Stratified by MT1M (rs9936741) Genotype; d: Scatter Plot of Ln-transformed Hair Hg against Estimated Daily Hg Intake from Fish Stratified by MT1A (rs8052394) Genotype; ..... | 4 |
| Supplemental Material Table 1. Summary of Average Hg Concentration in Fish Species.....                                                                                                                                                                                                                                                                                                                                                                                                                                                           | 5 |
| Supplemental Material Table 2. Arithmetic Mean Urine Hg levels ( $\mu\text{g/L}$ ) Stratified by Levels of Elemental Hg Exposures from Occupational Practice and Personal Amalgam.....                                                                                                                                                                                                                                                                                                                                                            | 6 |
| Supplemental Material Table 3. Mean Hair Hg Levels ( $\mu\text{g/g}$ ) Stratified by Levels of Estimated Methylmercury Intake from Dietary Fish Consumption.....                                                                                                                                                                                                                                                                                                                                                                                  | 7 |
| Supplemental Material Table 4. Arithmetic Mean Urinary Hg Levels ( $\mu\text{g/L}$ ) and Hair Hg Levels ( $\mu\text{g/g}$ ) Stratified by Genotypes of Selected Metallothionein SNPs.....                                                                                                                                                                                                                                                                                                                                                         | 8 |
| Supplemental Material Table 5. Coefficients and p Values from Multivariate Linear Regression Models of Natural Log-transformed Urinary Hg Predicted                                                                                                                                                                                                                                                                                                                                                                                               |   |

against Exposure Surrogates of Elemental Hg, SNP Genotypes and Exposure-SNP Interactions.....9

Supplemental Material Table 6. Coefficients and p Values from Multivariate Linear Regression Models of Natural Log-transformed Hair Hg Predicted by Estimated Methylmercury Exposure, SNP Genotypes and Intake-SNP Interactions.....11

Reference.....12

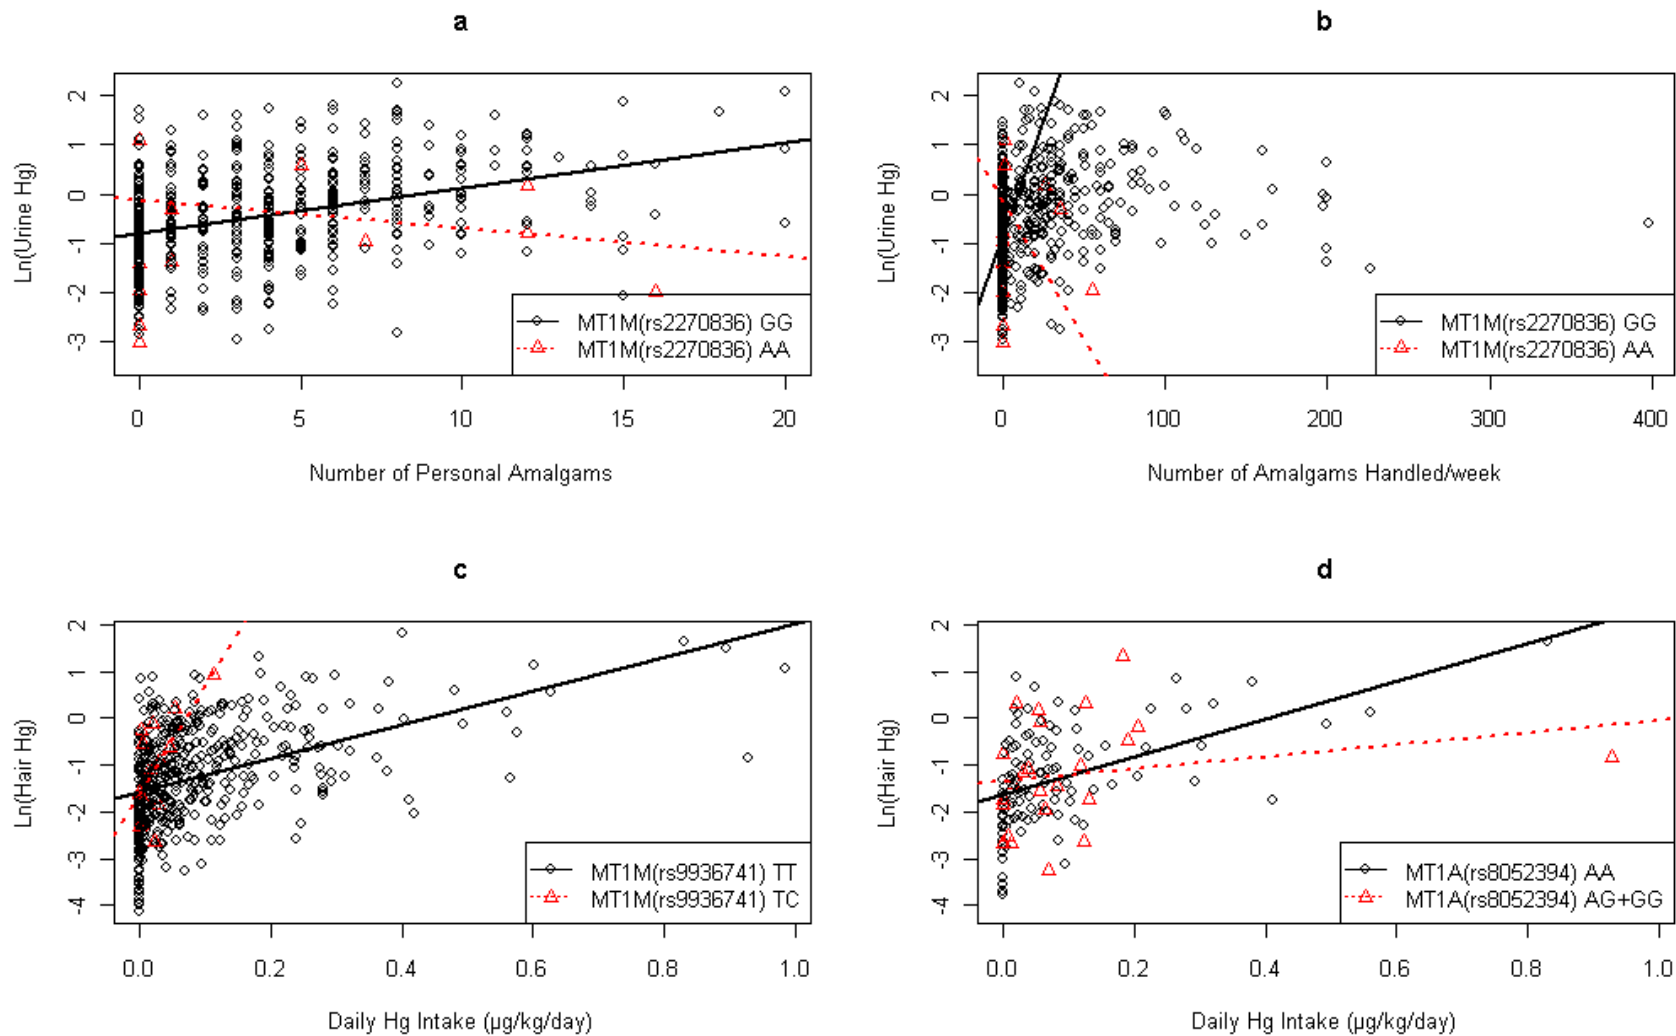

Supplemental Material, Figure 1. a: Scatter Plot of Ln-transformed Urine Hg against Number of Personal Amalgams Stratified by MT1M (rs2270836) Genotype; b: Scatter Plot of Ln-transformed Urine Hg against Number of Amalgam Handled Stratified by MT1M (rs2270836) Genotype; c: Scatter Plot of Ln-transformed Hair Hg against Estimated Daily Hg Intake from Fish Stratified by MT1M (rs9936741) Genotype; d: Scatter Plot of Ln-transformed Hair Hg against Estimated Daily Hg Intake from Fish Stratified by MT1A (rs8052394) Genotype

Supplemental Material, Table 1. Summary of Average Hg Concentrations in Fish species

| Fish Species       | Average Concentration<br>(µg Hg/g) | Source                                           | Year of Data | Number of<br>Samples<br>Averaged |
|--------------------|------------------------------------|--------------------------------------------------|--------------|----------------------------------|
| Tuna White(canned) | 0.356                              | FDA Monitoring Program <sup>a</sup>              | 2003         | 27                               |
| Tuna Light(canned) | 0.258                              | FDA monitoring program                           | 2003         | 12                               |
| Tuna Fresh         | 0.647                              | FDA monitoring program                           | 2001-2004    | 9                                |
| Salmon             | 0.015                              | FDA monitoring program                           | 2003         | 1                                |
| Shrimp             | 0.028                              | FDA monitoring program                           | 1993-1995    | 2                                |
| Cod                | 0.084                              | FDA monitoring program                           | 2004         | 19                               |
| Crab               | 0.049                              | FDA monitoring program                           | 2004-2005    | 4                                |
| Scallop            | 0                                  | FDA monitoring program                           | 1991         | 1                                |
| Mussel             | 0.091                              | Mierzykowski et al. 2001                         | -            | -                                |
| Halibut            | 0.232                              | FDA monitoring program                           | 2004         | 14                               |
| Lobster            | 0.224                              | FDA monitoring program                           | 2004         | 10                               |
| Clam               | 0                                  | FDA monitoring program                           | 1991-1993    | 6                                |
| Oyster             | 0.014                              | FDA monitoring program                           | 2004         | 4                                |
| Perch              | 0.005                              | FDA monitoring program                           | 1991, 1994   | 6                                |
| Perch Freshwater   | 0.141                              | FDA monitoring program                           | 1991, 1995   | 5                                |
| Trout              | 0.111                              | FDA monitoring program                           | 2002-2004    | 17                               |
| Carp               | 0.271                              | FDA monitoring program                           | 1993         | 1                                |
| Walleye            | 0.065                              | FDA monitoring program                           | 1991-1994    | 4                                |
| Seabass            | 0.679                              | FDA monitoring program                           | 1996-1997    | 3                                |
| Fresh Seabass      | 0.38                               | Bahnick et al. 1994                              | -            | -                                |
| Pike               | 0.31                               | Bahnick et al. 1994                              | -            | -                                |
| Swordfish          | 1.312                              | FDA monitoring program                           | 2002-2004    | 13                               |
| Red Snapper        | 0.193                              | FDA monitoring program                           | 2002-2004    | 36                               |
| Shark              | 1.086                              | FDA monitoring program                           | 1992-2000    | 29                               |
| King Mackerel      | 0.73                               | American Heart Association Fish 101 <sup>b</sup> | -            | -                                |
| Porgy              | 0.522                              | NOAA Technical Report 1978                       | -            | -                                |
| Tilapia            | 0.01                               | FDA monitoring program                           | 1991-1992    | 9                                |
| Whitefish          | 0.074                              | FDA monitoring program                           | 2002-2004    | 19                               |

<sup>a</sup> US Food and Drug Administration 1990-2010

<sup>b</sup> American Heart Association 20 May 2010

Supplemental Material, Table 2. Arithmetic Mean Urine Hg levels ( $\mu\text{g/L}$ ) Stratified by Levels of Elemental Hg Exposures from Occupational Practice and Personal Amalgam

| Amalgam handled/wk (N) | Urine Hg (SD)( $\mu\text{g/L}$ )* | Personal amalgam (N) | Urine Hg (SD) ( $\mu\text{g/L}$ )* |
|------------------------|-----------------------------------|----------------------|------------------------------------|
| 0 (215)                | 0.70(0.71)                        | 0 (128)              | 0.61(0.79)                         |
| 1-20 (102)             | 1.16(1.48)                        | 1-3 (127)            | 0.91(0.90)                         |
| 21-45 (102)            | 1.36(1.32)                        | 4-6 (132)            | 1.11(1.32)                         |
| $\geq 46$ (82)         | 1.50(1.62)                        | $\geq 7$ (114)       | 1.67(1.61)                         |

\* Cochran-Armitage trend test :  $p < 0.05$

SD: standard deviation

Supplemental Material, Table 3. Mean Hair Hg Levels ( $\mu\text{g/g}$ ) Stratified by Levels of Estimated Methylmercury Intake from Dietary Fish Consumption

| Hair Hg<br>( $\mu\text{g/g}$ ) | Daily MeHg Intake (I) ( $\mu\text{g/kg/day}$ ) | Mean Hair Hg |
|--------------------------------|------------------------------------------------|--------------|
|                                | (N)                                            | (SD)*        |
|                                | 0 $\leq$ I<0.01 (145)                          | 0.22 (0.28)  |
|                                | 0.01 $\leq$ I<0.05 (137)                       | 0.39 (0.39)  |
|                                | 0.05 $\leq$ I<0.12 (112)                       | 0.56 (0.48)  |
|                                | I $\geq$ 0.12 (109)                            | 0.91 (1.02)  |

\* Cochran-Armitage linear trend test:  $p < 0.05$   
SD: standard deviation

Supplemental Material, Table 4: Arithmetic Mean Urinary Hg Levels ( $\mu\text{g/L}$ ) and Hair Hg Levels ( $\mu\text{g/g}$ ) Stratified by Genotypes of Selected Metallothionein SNPs

| SNP name                        | db SNP     | N   | Mean Urinary Hg ( $\mu\text{g/L}$ ) |                  |                        |                | Mean Hair Hg ( $\mu\text{g/g}$ ) |                |                  |                        |                |
|---------------------------------|------------|-----|-------------------------------------|------------------|------------------------|----------------|----------------------------------|----------------|------------------|------------------------|----------------|
|                                 |            |     | Homozygote (N)                      | Heterozygote (N) | Homozygote variant (N) | ANOVA <i>p</i> | N                                | Homozygote (N) | Heterozygote (N) | Homozygote variant (N) | ANOVA <i>p</i> |
| SNPs Analyzed in Both 2009-2010 |            |     |                                     |                  |                        |                |                                  |                |                  |                        |                |
| MT2A 3'UTR(G>C)                 | rs10636    | 464 | 1.04(251)                           | 1.04(171)        | 1.22(42)               | 0.65           | 473                              | 0.50(254)      | 0.43(174)        | 0.57(45)               | 0.28           |
| MTF1 3'UTR(G>A)                 | rs473279   | 463 | 1.04(215)                           | 1.06(206)        | 1.17(42)               | 0.81           | 472                              | 0.47(217)      | 0.51(212)        | 0.43(43)               | 0.64           |
| MT1M 3'UTR(T>C)                 | rs9936741  | 465 | 1.05(449)                           | 1.09(16)         | -                      | 0.88           | 474                              | 0.48(459)      | 0.55(15)         | -                      | <b>0.65</b>    |
| MT1M 3'UTR(G>A)                 | rs2270836  | 460 | 1.04(329)                           | 1.10(120)        | 0.98(11)               | 0.88           | 469                              | 0.47(337)      | 0.51(122)        | 0.33(10)               | 0.69           |
| MT1A missense(A>C)              | rs11640851 | 447 | 1.03(190)                           | 1.09(202)        | 0.97(55)               | 0.76           | 454                              | 0.44(194)      | 0.51(205)        | 0.52(55)               | 0.51           |
| SNPs Analyzed in 2009           |            |     |                                     |                  |                        |                |                                  |                |                  |                        |                |
| MTF1 3'UTR(T>C)                 | rs3748682  | 220 | 1.17(125)                           | 1.05(81)         | 1.15(14)               | 0.78           | 221                              | 0.48(127)      | 0.63(81)         | 0.44(13)               | 0.30           |
| MT1M missense(A>C)              | rs1827210  | 221 | 1.09(162)                           | 1.22(51)         | 1.13(9)                | 0.81           | 223                              | 0.50(165)      | 0.67(50)         | 0.32(8)                | 0.26           |
| MT1G 3'UTR(G>T)                 | rs12315    | 222 | 1.11(201)                           | 1.18(20)         | 0.54(1)                | 0.87           | 223                              | 0.53(202)      | 0.56(20)         | 1.72(1)                | 0.26           |
| MT1E 3'UTR(G>T)                 | rs708274   | 223 | 1.12(171)                           | 1.13(49)         | 0.48(3)                | 0.67           | 224                              | 0.55(174)      | 0.50(47)         | 0.34(3)                | 0.81           |
| MT4 missense(G>A)               | rs11643815 | 221 | 1.07(167)                           | 1.20(51)         | 1.96(3)                | 0.39           | 222                              | 0.53(166)      | 0.55(52)         | 0.33(4)                | 0.84           |
| SNPs Analyzed in 2010           |            |     |                                     |                  |                        |                |                                  |                |                  |                        |                |
| MT2A 5'UTR(A>G)                 | rs28366003 | 239 | 1.03(213)                           | 0.76(24)         | 0.34(2)                | 0.40           | 247                              | 0.44(220)      | 0.39(25)         | 0.43(2)                | 0.88           |
| MT1A missense(A>G)              | rs8052394  | 131 | 0.95(109)                           | 0.89(21)         | 0.28(1)                | 0.82           | 136                              | 0.50(113)      | 0.44(22)         | 0.16(1)                | 0.87           |
| MT1A 5'near gene(C>G)           | rs9922957  | 234 | 1.02(180)                           | 0.95(50)         | 0.69(4)                | 0.82           | 242                              | 0.45(184)      | 0.37(54)         | 0.43(4)                | 0.60           |

<sup>a</sup>When number of homozygote variant is smaller than 9 and 8 for urine Hg and hair Hg, respectively, the ANOVA results shown are for comparing homozygote and the pooled heterozygote and homozygote variant.



Supplemental Material, Table 5: Coefficients and p Values from Multivariate Linear Regression Models of Natural Log-transformed Urinary Hg Predicted against Exposure Surrogates of Elemental Hg, SNP Genotypes and Exposure-SNP Interactions

| SNP name              | db SNP     | R <sup>2</sup> | Base model       |          |                      |          |            |          | SNP main effects |          |                    |             |  |
|-----------------------|------------|----------------|------------------|----------|----------------------|----------|------------|----------|------------------|----------|--------------------|-------------|--|
|                       |            |                | Personal Amalgam |          | Amalgam handled/week |          | Nondentist |          | Heterozygote     |          | Homozygote variant |             |  |
|                       |            |                | $\beta$          | <i>p</i> | $\beta$              | <i>p</i> | $\beta$    | <i>p</i> | $\beta$          | <i>p</i> | $\beta$            | <i>p</i>    |  |
| <b>2009-2010</b>      |            |                |                  |          |                      |          |            |          |                  |          |                    |             |  |
| MT2A 3'UTR(G>C)       | rs10636    | 0.24           | 0.080            | <0.0001  | 0.06                 | 0.37     | -0.54      | 0.0002   | -0.19            | 0.41     | -0.02              | 0.96        |  |
| MTF1 3'UTR(G>A)       | rs473279   | 0.24           | 0.086            | <0.0001  | 0.18                 | 0.01     | -0.28      | 0.06     | 0.36             | 0.11     | 0.28               | 0.43        |  |
| MT1M 3'UTR(T>C)       | rs9936741  | 0.24           | 0.081            | <0.0001  | 0.13                 | 0.01     | -0.42      | <0.0001  | 0.52             | 0.44     | -                  | -           |  |
| MT1M 3'UTR(G>A)       | rs2270836  | 0.25           | 0.085            | <0.0001  | 0.11                 | 0.04     | -0.38      | 0.001    | -0.04            | 0.87     | <b>1.85</b>        | <b>0.01</b> |  |
| MT1A missense(A>C)    | rs11640851 | 0.24           | 0.084            | <0.0001  | 0.15                 | 0.02     | -0.40      | 0.007    | 0.12             | 0.60     | 0.36               | 0.32        |  |
| <b>2009</b>           |            |                |                  |          |                      |          |            |          |                  |          |                    |             |  |
| MTF1 3'UTR(T>C)       | rs3748682  | 0.24           | 0.069            | <0.0001  | 0.04                 | 0.71     | -0.69      | 0.003    | -0.62            | 0.10     | -0.32              | 0.75        |  |
| MT1M missense(A>C)    | rs1827210  | 0.24           | 0.068            | <0.0001  | 0.14                 | 0.13     | -0.37      | 0.08     | -0.33            | 0.42     | 1.00               | 0.20        |  |
| MT1G 3'UTR(G>T)       | rs12315    | 0.24           | 0.063            | <0.0001  | 0.15                 | 0.06     | -0.41      | 0.02     | -0.34            | 0.54     | -                  | -           |  |
| MT1E 3'UTR(G>T)       | rs708274   | 0.23           | 0.076            | <0.0001  | 0.15                 | 0.09     | -0.32      | 0.11     | 0.21             | 0.61     | -                  | -           |  |
| MT4 missense(G>A)     | rs11643815 | 0.23           | 0.063            | <0.0001  | 0.13                 | 0.14     | -0.39      | 0.04     | -0.40            | 0.38     | -                  | -           |  |
| <b>2010</b>           |            |                |                  |          |                      |          |            |          |                  |          |                    |             |  |
| MT2A 5'UTR(A>G)       | rs28366003 | 0.26           | 0.091            | <0.0001  | 0.09                 | 0.13     | -0.54      | 0.0001   | -0.43            | 0.32     | -                  | -           |  |
| MT1A missense(A>G)    | rs8052394  | 0.23           | 0.127            | <0.0001  | 0.06                 | 0.4      | -0.43      | 0.02     | 0.46             | 0.40     | -                  | -           |  |
| MT1A 5'near gene(C>G) | rs9922957  | 0.24           | 0.100            | <0.0001  | 0.048                | 0.45     | -0.48      | 0.0007   | 0.06             | 0.87     | -                  | -           |  |

Supplemental Material, Table 5 (Cont.): Coefficients and p Values from Multivariate Linear Regression Models of Natural Log-transformed Urinary Hg Predicted against Exposure Surrogates of Elemental Hg, SNP Genotypes and Exposure-SNP Interactions

| SNP name              | db SNP     | SNP-exposure interactions |          |                                |          |                           |          |                              |             |                                      |             |                                 |          |
|-----------------------|------------|---------------------------|----------|--------------------------------|----------|---------------------------|----------|------------------------------|-------------|--------------------------------------|-------------|---------------------------------|----------|
|                       |            | Amalgam X heterozygote    |          | Amalgam handled X heterozygote |          | Nondentist X heterozygote |          | Amalgam X homozygote variant |             | Amalgam handled X homozygote variant |             | Nondentist X homozygote variant |          |
|                       |            | $\beta$                   | <i>p</i> | $\beta$                        | <i>p</i> | $\beta$                   | <i>p</i> | $\beta$                      | <i>p</i>    | $\beta$                              | <i>p</i>    | $\beta$                         | <i>p</i> |
| <b>2009-2010</b>      |            |                           |          |                                |          |                           |          |                              |             |                                      |             |                                 |          |
| MT2A 3'UTR(G>C)       | rs10636    | -0.005                    | 0.80     | 0.13                           | 0.17     | 0.23                      | 0.29     | 0.04                         | 0.27        | 0.007                                | 0.96        | -0.002                          | 0.99     |
| MTF1 3'UTR(G>A)       | rs473279   | -0.012                    | 0.55     | -0.15                          | 0.12     | -0.36                     | 0.09     | 0.004                        | 0.91        | -0.11                                | 0.49        | -0.20                           | 0.56     |
| MT1M 3'UTR(T>C)       | rs9936741  | -0.01                     | 0.86     | -0.22                          | 0.41     | -0.60                     | 0.27     | -                            | -           | -                                    | -           | -                               | -        |
| MT1M 3'UTR(G>A)       | rs2270836  | -0.002                    | 0.92     | 0.11                           | 0.32     | -0.03                     | 0.90     | <b>-0.25</b>                 | <b>0.02</b> | <b>-0.97</b>                         | <b>0.01</b> | -0.05                           | 0.94     |
| MT1A missense(A>C)    | rs11640851 | -0.003                    | 0.88     | -0.055                         | 0.58     | -0.09                     | 0.70     | -0.013                       | 0.71        | -0.12                                | 0.40        | -0.13                           | 0.69     |
| <b>2009</b>           |            |                           |          |                                |          |                           |          |                              |             |                                      |             |                                 |          |
| MTF1 3'UTR(T>C)       | rs3748682  | 0.011                     | 0.73     | 0.23                           | 0.18     | 0.68                      | 0.06     | 0.02                         | 0.86        | 0.20                                 | 0.60        | 0.56                            | 0.43     |
| MT1M missense(A>C)    | rs1827210  | 0.009                     | 0.76     | 0.25                           | 0.20     | 0.25                      | 0.55     | -0.01                        | 0.90        | -0.63                                | 0.15        | -0.41                           | 0.54     |
| MT1G 3'UTR(G>T)       | rs12315    | 0.06                      | 0.13     | -0.20                          | 0.63     | -0.12                     | 0.84     | -                            | -           | -                                    | -           | -                               | -        |
| MT1E 3'UTR(G>T)       | rs708274   | -0.009                    | 0.78     | 0.03                           | 0.90     | -0.24                     | 0.56     | -                            | -           | -                                    | -           | -                               | -        |
| MT4 missense(G>A)     | rs11643815 | 0.04                      | 0.23     | 0.15                           | 0.45     | 0.16                      | 0.72     | -                            | -           | -                                    | -           | -                               | -        |
| <b>2010</b>           |            |                           |          |                                |          |                           |          |                              |             |                                      |             |                                 |          |
| MT2A 5'UTR(A>G)       | rs28366003 | 0.03                      | 0.60     | -0.08                          | 0.63     | 0.45                      | 0.22     | -                            | -           | -                                    | -           | -                               | -        |
| MT1A missense(A>G)    | rs8052394  | -0.09                     | 0.09     | 0.04                           | 0.86     | -0.05                     | 0.92     | -                            | -           | -                                    | -           | -                               | -        |
| MT1A 5'near gene(C>G) | rs9922957  | -0.03                     | 0.45     | 0.08                           | 0.56     | -0.04                     | 0.90     | -                            | -           | -                                    | -           | -                               | -        |

<sup>a</sup> When number of homozygote variant is smaller than 9, the ANOVA results shown is for comparing homozygote and the pooled heterozygote and homozygote variant.

Supplemental Material, Table 6: Coefficients and p Values from Multivariate Linear Regression Models of Natural Log-transformed Hair Hg Predicted by Estimated Methylmercury Exposure, SNP Genotypes and Intake-SNP Interactions

| SNP Name              | db SNP     | Base model     |                             |         | SNP main effects |      |                    |      | SNP-intake interactions |             |                             |      |  |
|-----------------------|------------|----------------|-----------------------------|---------|------------------|------|--------------------|------|-------------------------|-------------|-----------------------------|------|--|
|                       |            | R <sup>2</sup> | Estimated Daily MeHg Intake |         | Heterozygote     |      | Homozygote variant |      | Intake X Heterozygote   |             | Intake X homozygote variant |      |  |
|                       |            |                | $\beta$                     | $p$     | $\beta$          | $p$  | $\beta$            | $p$  | $\beta$                 | $p$         | $\beta$                     | $p$  |  |
| <b>2009-2010</b>      |            |                |                             |         |                  |      |                    |      |                         |             |                             |      |  |
| MT2A 3'UTR(G>C)       | rs10636    | 0.19           | 3.52                        | <0.0001 | -0.15            | 0.17 | -0.10              | 0.56 | 0.38                    | 0.65        | 0.45                        | 0.68 |  |
| MTF1 3'UTR(G>A)       | rs473279   | 0.19           | 4.52                        | <0.0001 | 0.13             | 0.23 | -0.14              | 0.50 | 1.42                    | 0.06        | 0.15                        | 0.93 |  |
| MT1M 3'UTR(T>C)       | rs9936741  | 0.20           | 3.69                        | <0.0001 | -0.03            | 0.92 | -                  | -    | <b>19.3</b>             | <b>0.02</b> | -                           | -    |  |
| MT1M 3'UTR(G>A)       | rs2270836  | 0.19           | 3.93                        | <0.0001 | -0.04            | 0.72 | -0.14              | 0.78 | -0.67                   | 0.36        | -5.33                       | 0.68 |  |
| MT1A missense(A>C)    | rs11640851 | 0.18           | 3.74                        | <0.0001 | -0.007           | 0.95 | -0.09              | 0.61 | -0.24                   | 0.78        | -0.22                       | 0.84 |  |
| <b>2009</b>           |            |                |                             |         |                  |      |                    |      |                         |             |                             |      |  |
| MTF1 3'UTR(T>C)       | rs3748682  | 0.24           | 4.97                        | <0.0001 | 0.32             | 0.06 | 0.21               | 0.57 | -1.63                   | 0.13        | 1.23                        | 0.73 |  |
| MT1M missense(A>C)    | rs1827210  | 0.23           | 4.4                         | <0.0001 | 0.05             | 0.81 | -0.05              | 0.93 | -0.61                   | 0.56        | -1.36                       | 0.98 |  |
| MT1G 3'UTR(G>T)       | rs12315    | 0.23           | 4.21                        | <0.0001 | 0.30             | 0.38 | -                  | -    | -1.45                   | 0.52        | -                           | -    |  |
| MT1E 3'UTR(G>T)       | rs708274   | 0.24           | 4.79                        | <0.0001 | -0.05            | 0.77 | -                  | -    | -1.57                   | 0.13        | -                           | -    |  |
| MT4 missense(G>A)     | rs11643815 | 0.24           | 3.97                        | <0.0001 | -0.23            | 0.21 | -                  | -    | 0.73                    | 0.54        | -                           | -    |  |
| <b>2010</b>           |            |                |                             |         |                  |      |                    |      |                         |             |                             |      |  |
| MT2A 5'UTR(A>G)       | rs28366003 | 0.14           | 3.08                        | <0.0001 | -0.17            | 0.51 | -                  | -    | 0.97                    | 0.60        | -                           | -    |  |
| MT1A missense(A>G)    | rs8052394  | 0.21           | 4.04                        | <0.0001 | 0.21             | 0.40 | -                  | -    | <b>-300</b>             | <b>0.02</b> | -                           | -    |  |
| MT1A 5'near gene(C>G) | rs9922957  | 0.15           | 3.52                        | <0.0001 | -0.22            | 0.19 | -                  | -    | -1.04                   | 0.36        | -                           | -    |  |

## Reference

American Heart Association. 20 May 2010. Fish 101. Available:

[http://www.heart.org/HEARTORG/GettingHealthy/NutritionCenter/Fish-101\\_UCM\\_305986\\_Article.jsp#fish\\_with\\_high\\_levels\\_of\\_mercury](http://www.heart.org/HEARTORG/GettingHealthy/NutritionCenter/Fish-101_UCM_305986_Article.jsp#fish_with_high_levels_of_mercury) [accessed 11/04/2010]

Bahnick D, Sauer C, Butterworth B, Kuehl D. 1994. A national study of mercury contamination of fish. *Chemosphere* 29:537–546.

Mierzykowski S.E. and K.C. Carr. 2001. Total mercury and methylmercury in freshwater mussels *Elliptio complanata* from the Sudbury River watershed, Massachusetts. USFWS. Special Project Report FY98-MEFO-2-EC. Maine Field Office. Old Town, ME.

Manooch, Charles S., III, and William W. Hassler. 1978. Synopsis of biological data on the red porgy, *Pagrus pagrus* (Linnaeus). NOAA Technical Report NMFS Circular 412:9.

US Food and Drug Administration. 1990-2010. FDA monitoring program (1990-2010). Available:

<http://www.fda.gov/Food/FoodSafety/Product-SpecificInformation/Seafood/FoodbornePathogensContaminants/Methylmercury/ucm191007.htm> [accessed 11/04/2010]
